# Supplementary material for: hUMSCs Restore Uterine Function by Inhibiting Endometrial Fibrosis via Regulation of the MMP-9/TIMP-1 Ratio in CDDP-Induced Injury Rats
Source: Hindawi journal article supplement (doi:10.1155/2023/8014052), 2023-03-20

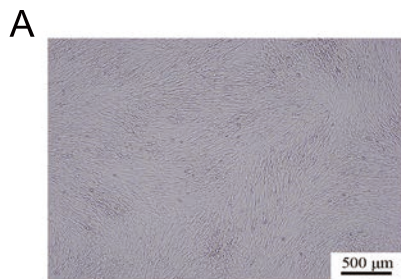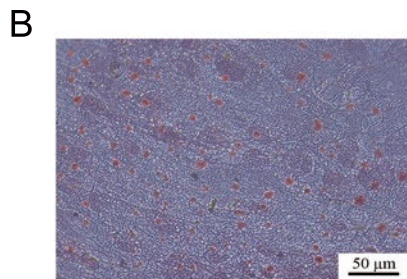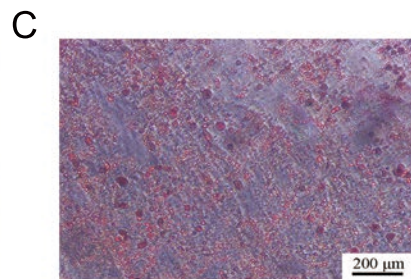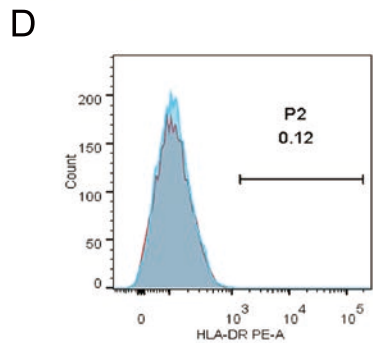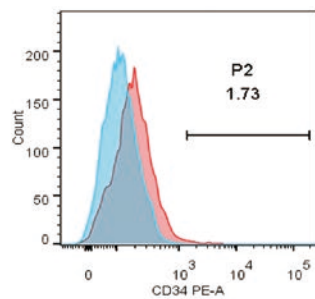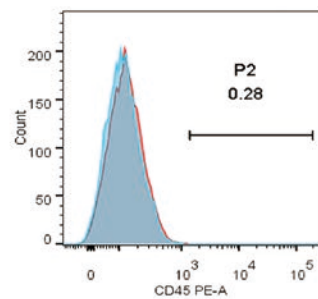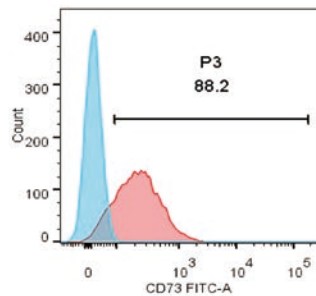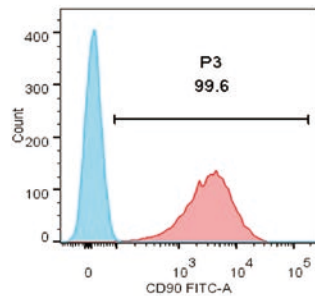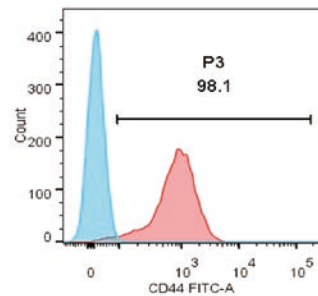

Supplement: f1 [file 8014052.f1.pdf]
